# Supplementary material
Source: PubMed Central journal article supplement (PMC3405841)
Supplement: auto-8-664-s01.pdf [file auto-8-664-s01.pdf]

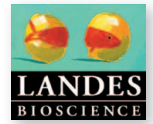

## **Supplemental Material to:**

**Virginie M.S. Betin, Thomas D.B. MacVicar,  
Stephen F. Parsons, David J. Anstee and Jon D. Lane**

**A cryptic mitochondrial targeting motif in Atg4D links  
caspase cleavage with mitochondrial import and oxidative  
stress**

**Autophagy 2012; 8(4)**

**<http://dx.doi.org/10.4161/auto.19227>**

**[www.landesbioscience.com/journals/autophagy/article/19227](http://www.landesbioscience.com/journals/autophagy/article/19227)**

Betin et al. Suppl. Fig. 1

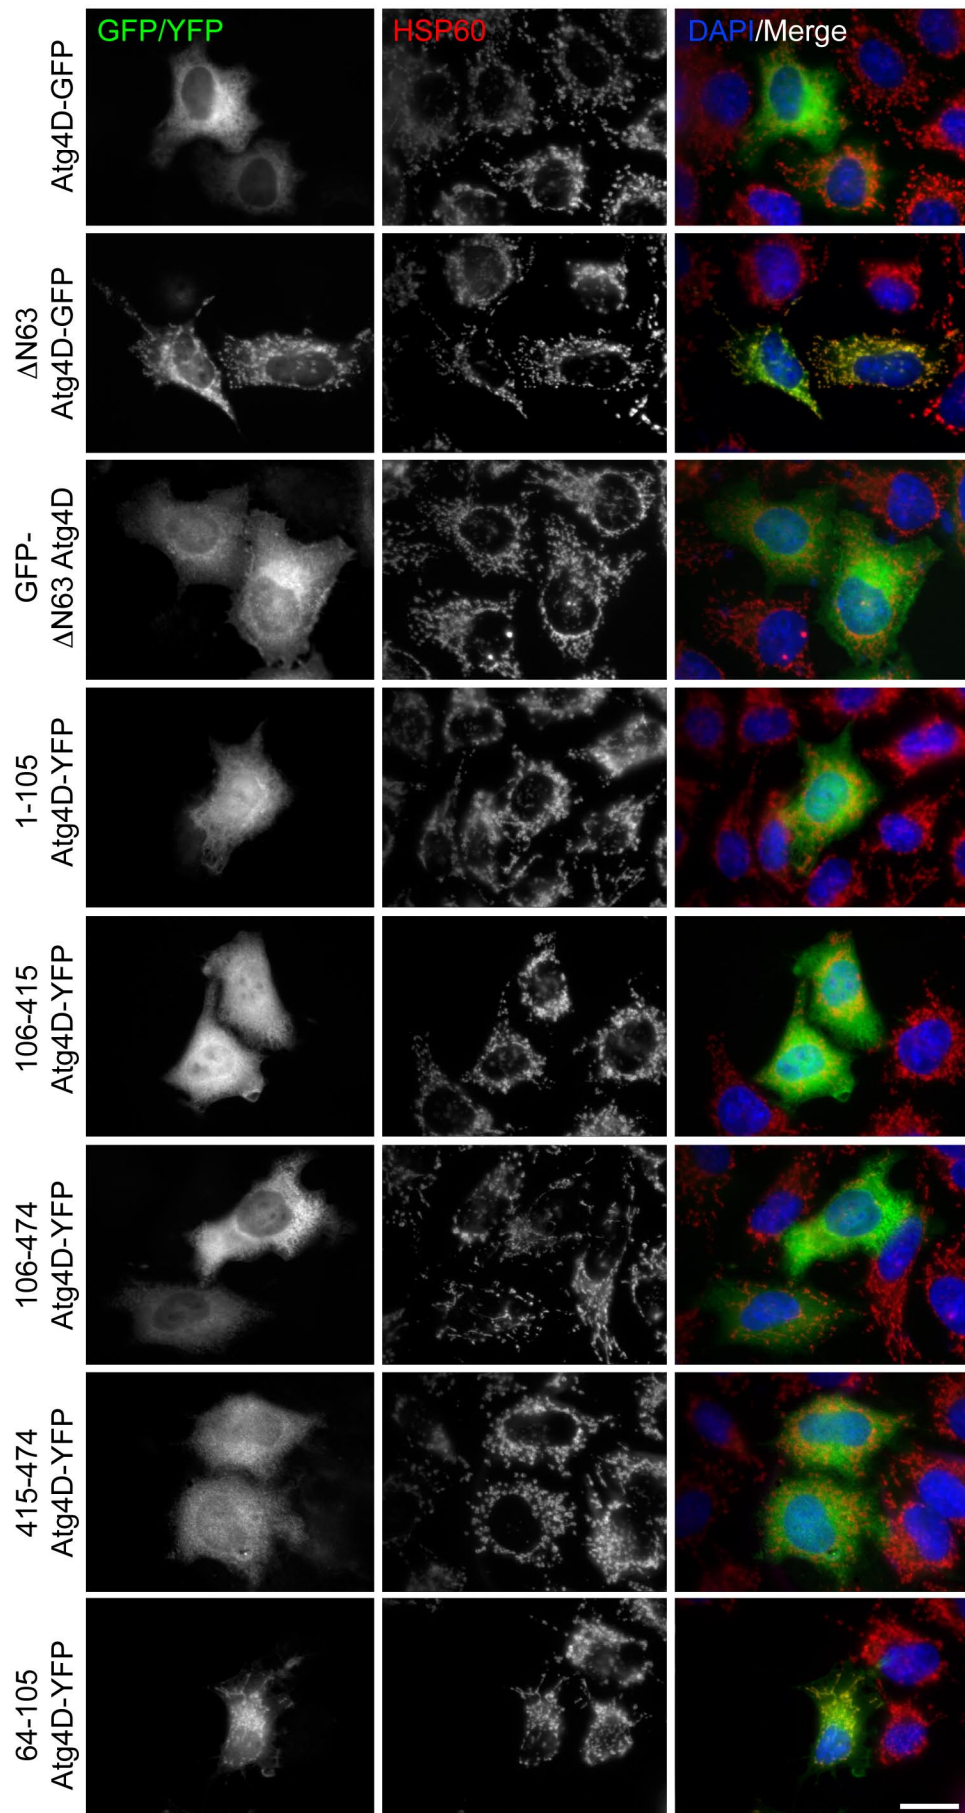

Betin et al. Suppl. Fig. 2

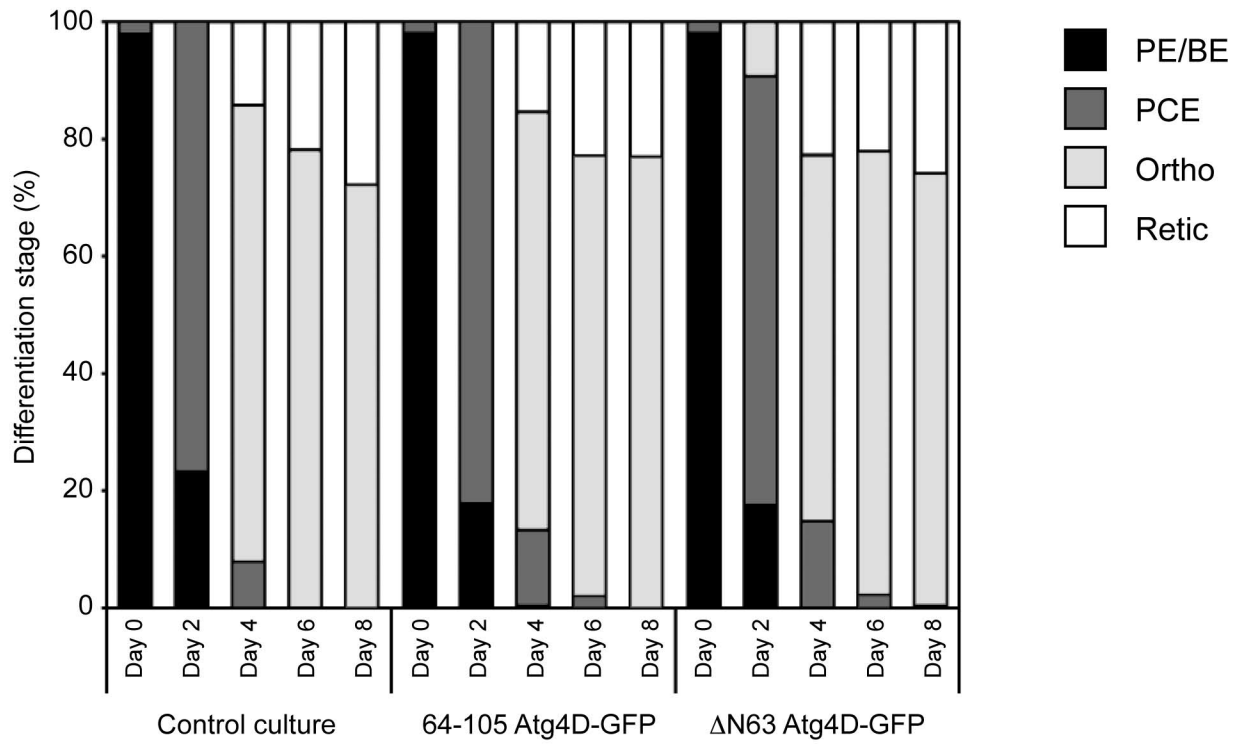

**Figure S1.** Examples of HeLa cells transiently expressing the constructs indicated in Fig. 1A. Cells were fixed and co-stained with anti-HSP60 antibodies to label mitochondria.

**Figure S2:** Analysis of erythroid cell differentiation in precursors expressing 64-105 Atg4D-GFP or  $\Delta$ N63 Atg4D-GFP. Unmodified human erythroid precursors (control culture), and precursors stably expressing 64-105 Atg4D-GFP or  $\Delta$ N63 Atg4D-GFP were differentiated in vitro. Differentiation status was assessed by light microscope on days 0, 2, 4, 6, 8 post switch to differentiation medium (numbers are normalized to take into account pre-incubation with lenivirus).
